# Supplementary material for: Harnessing electrochemical pH gradient for direct air capture with hydrogen and oxygen by-products in a calcium-based loop
Source: Royal Society of Chemistry journal article supplement (doi:10.1039/d1se00718a), 2021-01-01
Supplement: d1se00718a1.pdf [file d1se00718a1.pdf]

## Electronic Supplementary Information

### Harnessing Electrochemical pH Gradient for Direct Air Capture with Hydrogen and Oxygen By-Products in a Calcium-Based Loop

Congquan Zhou,<sup>a,‡</sup> Jihong Ni,<sup>a,‡</sup> Huiqi Chen,<sup>a,‡</sup> and Xiaofei Guan <sup>a,\*</sup>

<sup>a</sup>School of Physical Science and Technology, ShanghaiTech University, 393 Huaxia Middle  
Road, Shanghai, 201210, China

<sup>‡</sup> These authors contribute equally to this work.

\* E-mail: guanxf@shanghaitech.edu.cn

#### Table of Contents:

- Fig. S1
- Note S1
- Fig. S2
- Fig. S3
- Fig. S4
- Fig. S5
- Fig. S6
- Note S2
- Fig. S7
- Fig. S8
- Fig. S9
- Fig. S10
- Note S3
- Fig. S11
- Fig. S12
- Note S4
- Fig. S13
- Table S1
- Note S5

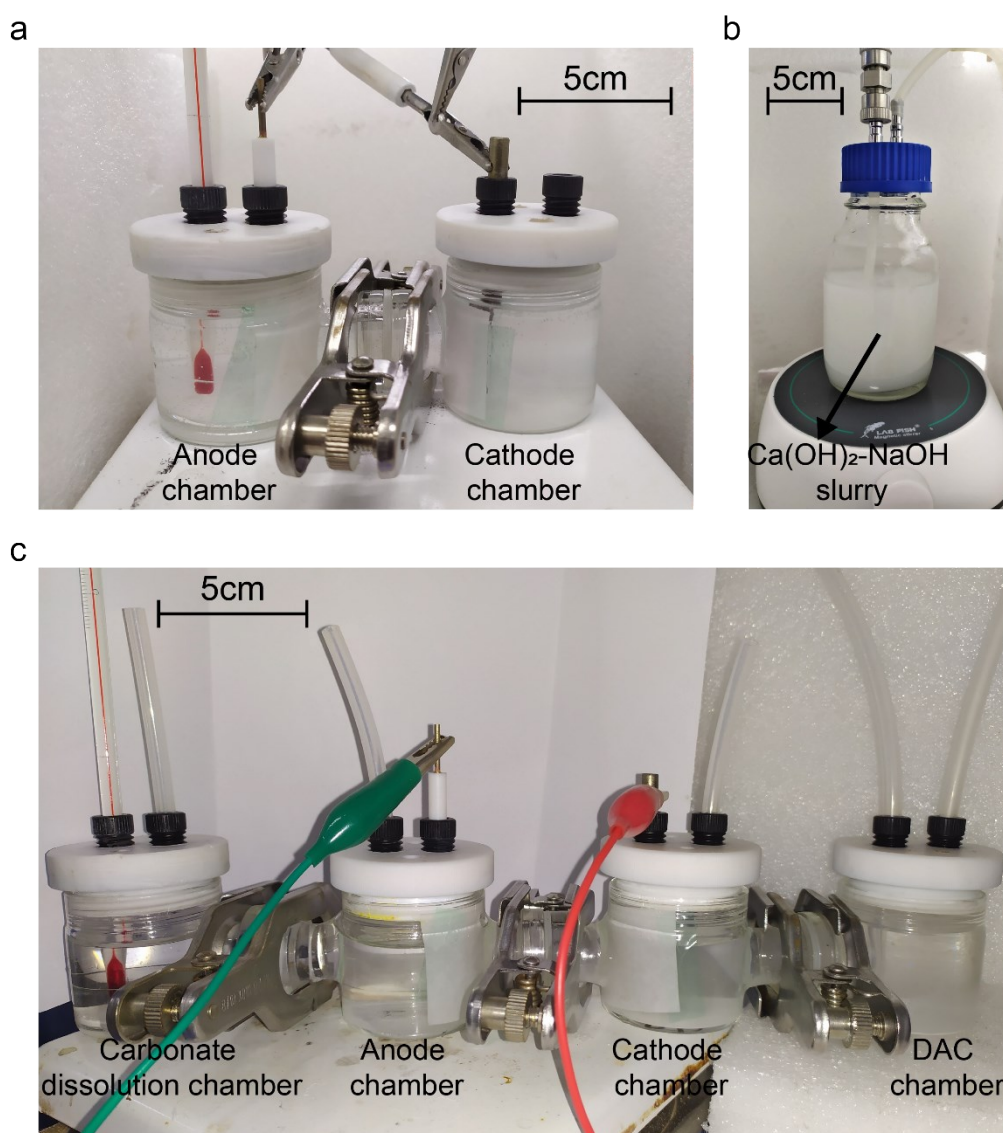

**Fig. S1.** Digital images of (a) the two-chamber H-cell for  $\text{CaCO}_3$  dissolution and  $\text{Ca(OH)}_2$  precipitation, (b) the single-chamber reactor for  $\text{CO}_2$  capture in  $\text{Ca(OH)}_2$ - $\text{NaOH}$  slurry, and (c) the four-chamber H-cell for simultaneous  $\text{CO}_2$  capture and carbonate regeneration.

**Note S1. Feasibility of TGA for quantitative analysis of  $\text{Ca(OH)}_2$ - $\text{CaCO}_3$  mixture:**

The equilibrium composition for 1 kmol of  $\text{Ca(OH)}_2$  and 1 kmol of  $\text{CaCO}_3$  as a function of temperature is shown in Fig. S2a.  $\text{Ca(OH)}_2$  starts to decompose at above 150 °C and the decomposition finishes at ~ 500°C.  $\text{CaCO}_3$  starts to decompose at ~ 500 °C and finishes at ~ 1000°C. In practice, however, a constant flow of Ar removes the water vapor and carbon dioxide continuously and enable  $\text{Ca(OH)}_2$  decomposition to start at ~ 340 °C and complete at ~ 420 °C. In comparison,  $\text{CaCO}_3$  decomposition starts at ~ 500 °C and completes at ~ 740 °C. In a typical TGA test,  $\text{Ca(OH)}_2$ - $\text{CaCO}_3$  mixture samples exposed to an Ar environment (flow rate: 50 ml/min) were heated from room temperature to 200 °C at a rate of 10 °C/min and held at 200 °C for 30 minutes to remove all the water vapor. The samples were then heated to 1000 °C at a rate of 4 °C/min. The temperature profile and the relative weight decrease for the decomposition of a  $\text{Ca(OH)}_2$ - $\text{CaCO}_3$  mixture sample was shown in Fig. S2b. The two weight losses due to the decomposition of  $\text{Ca(OH)}_2$  and  $\text{CaCO}_3$ , respectively, were observed with no overlaps. Therefore, a quantitative analysis of  $\text{Ca(OH)}_2$ - $\text{CaCO}_3$  mixture based on thermogravimetric result is feasible. It is noted that 1.84 wt.%  $\text{CaCO}_3$  impurity existed in the as-received  $\text{Ca(OH)}_2$ , as determined by TGA, and was subtracted in calculations to obtain the exact amount of  $\text{CaCO}_3$  formed during DAC.

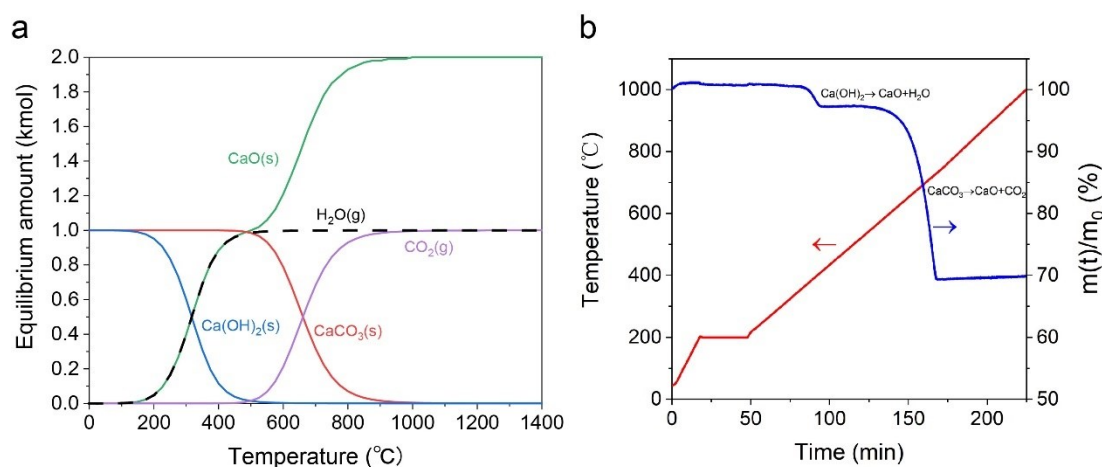

**Fig. S2.** (a) Equilibrium composition of  $\text{CaCO}_3$  and  $\text{Ca(OH)}_2$  vs. temperature at 1 bar. The starting amounts of both  $\text{CaCO}_3$  and  $\text{Ca(OH)}_2$  were set to 1 kmol for the thermodynamic calculation. (b) Temperature profile and relative weight decrease during a typical TGA run for quantitative analysis of a  $\text{Ca(OH)}_2$ - $\text{CaCO}_3$  mixture.

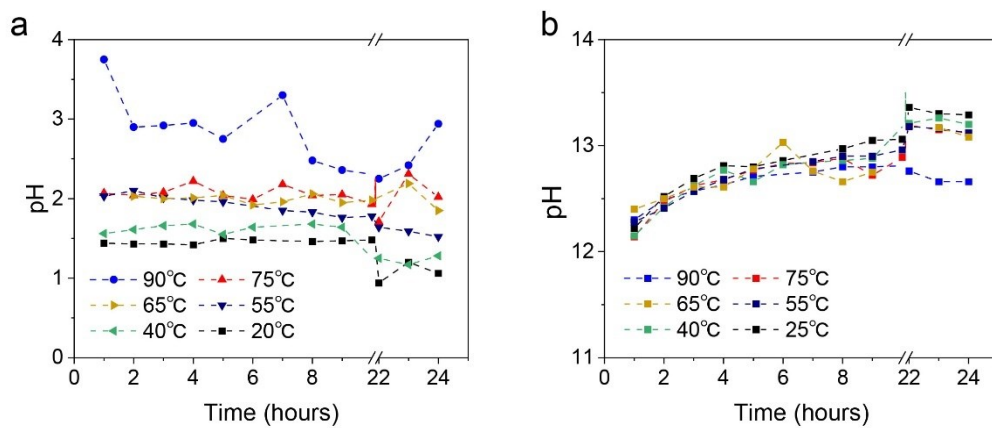

**Fig. S3.** The change of pH values of (a) analytes (b) catholytes during electrolysis performed at different temperatures under an applied current of 40 mA for 24 hours.

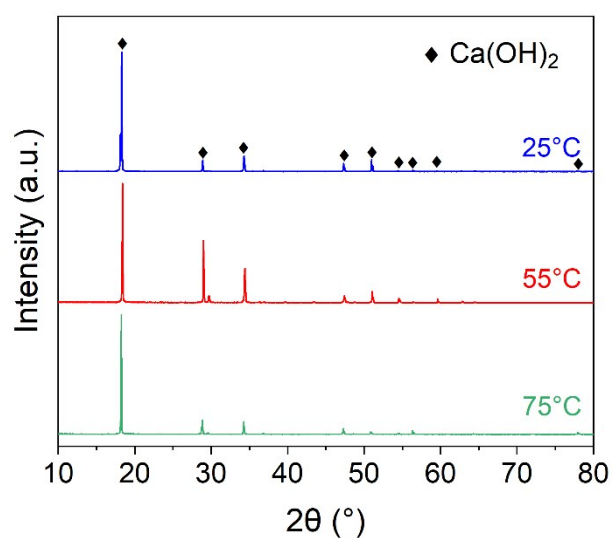

**Fig. S4.** Powder XRD patterns of the typical samples obtained from the precipitates collected in the cathode chambers after electrolysis experiments under 40 mA for 24 hours at 25, 55, 75°C, respectively. The data from the standard PDF card for Ca(OH)<sub>2</sub> (No. 00-044-1481) are used to index the diffraction peaks.

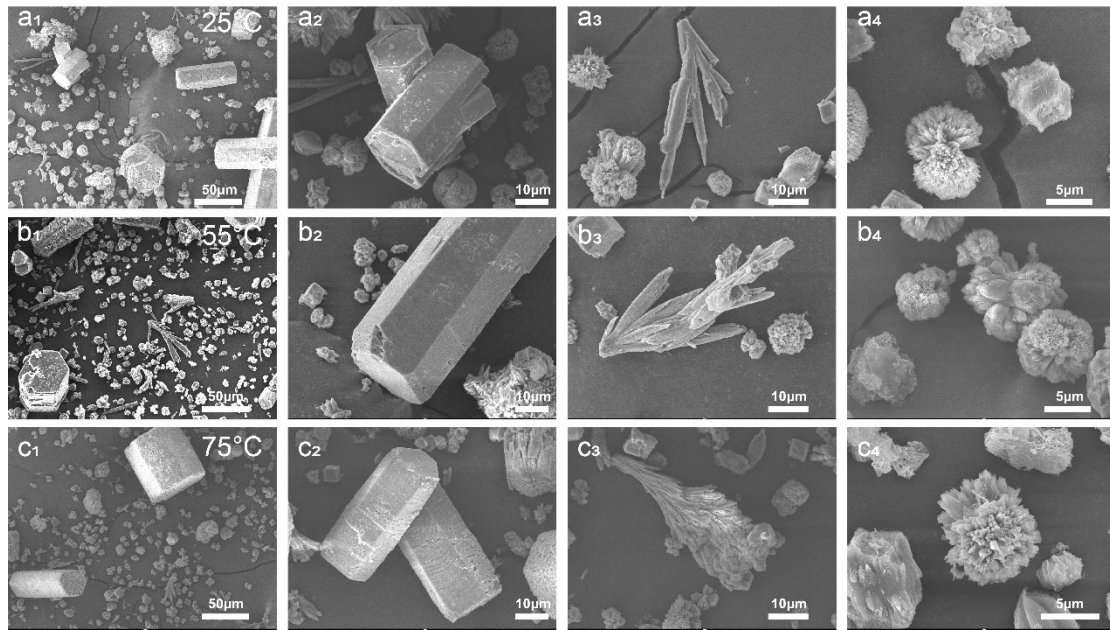

**Fig. S5.** SEM images of the  $\text{Ca}(\text{OH})_2$  precipitates collected from the cathode chamber after electrolysis experiments under 40 mA for 24 hours at (a<sub>1</sub>-a<sub>4</sub>) 25 °C, (b<sub>1</sub>-b<sub>4</sub>) 55 °C, and (c<sub>1</sub>-c<sub>4</sub>) 75 °C, respectively.

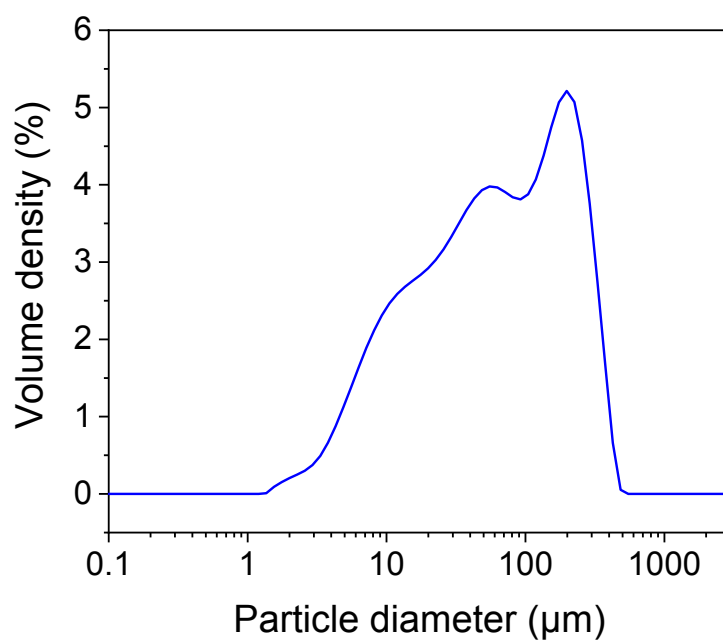

**Fig. S6.** The particle size distribution of the  $\text{Ca(OH)}_2$  formed in the cathode chamber after electrolysis experiments under 40 mA for 24 hours at 75 °C.

**Note S2. Thermodynamic equilibrium composition of Ca(OH)<sub>2</sub>-NaOH-air system:**

Thermochemical equilibrium computations were carried out based on HSC chemistry database<sup>1</sup>. Consider a Ca(OH)<sub>2</sub>-NaOH slurry bubbled with air containing 420 ppm of CO<sub>2</sub>, the relationship between equilibrium amounts of species in the system and temperature is shown in Fig. S7. Thermodynamically speaking, the carbonation reactions of both Ca(OH)<sub>2</sub> and NaOH by CO<sub>2</sub> are favorable at ambient temperature with near 100% CO<sub>2</sub> capture.

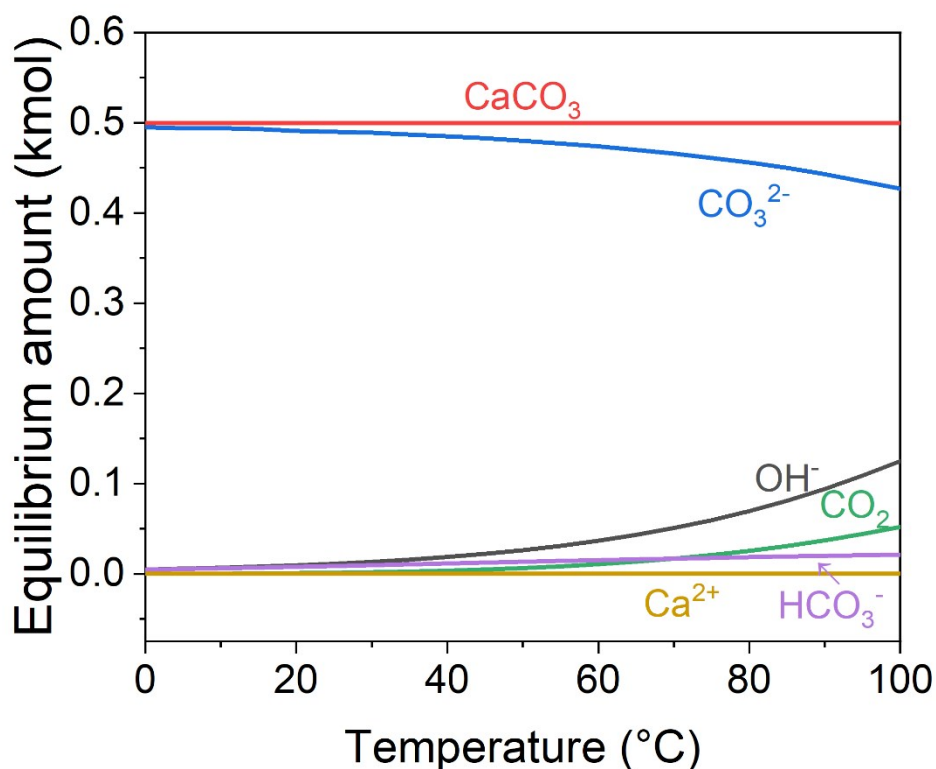

**Fig. S7.** The temperature dependence of equilibrium composition of products when Ca(OH)<sub>2</sub>-NaOH slurry is exposed to air containing 420 ppm of CO<sub>2</sub> at 1 bar. Initial stoichiometry: 1 kmol Na<sup>+</sup> + 1 kmol OH<sup>-</sup> + 0.5 kmol Ca(OH)<sub>2</sub> + 50 kmol H<sub>2</sub>O + 1 kmol CO<sub>2</sub> + 500 kmol O<sub>2</sub> + 1880 kmol N<sub>2</sub>.



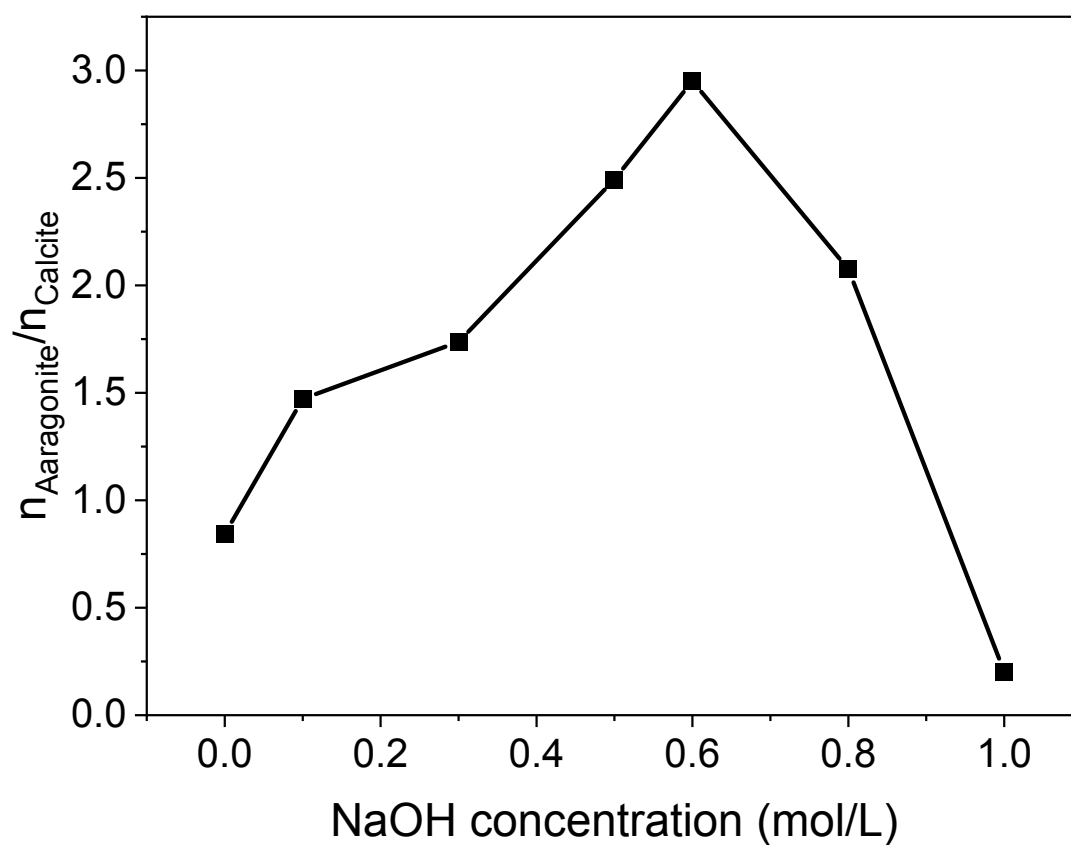

**Fig. S8.** The molar ratio of aragonite to calcite in the precipitates formed in  $\text{Ca}(\text{OH})_2$  slurries with different NaOH concentrations after 24-hour  $\text{CO}_2$  absorption from air.

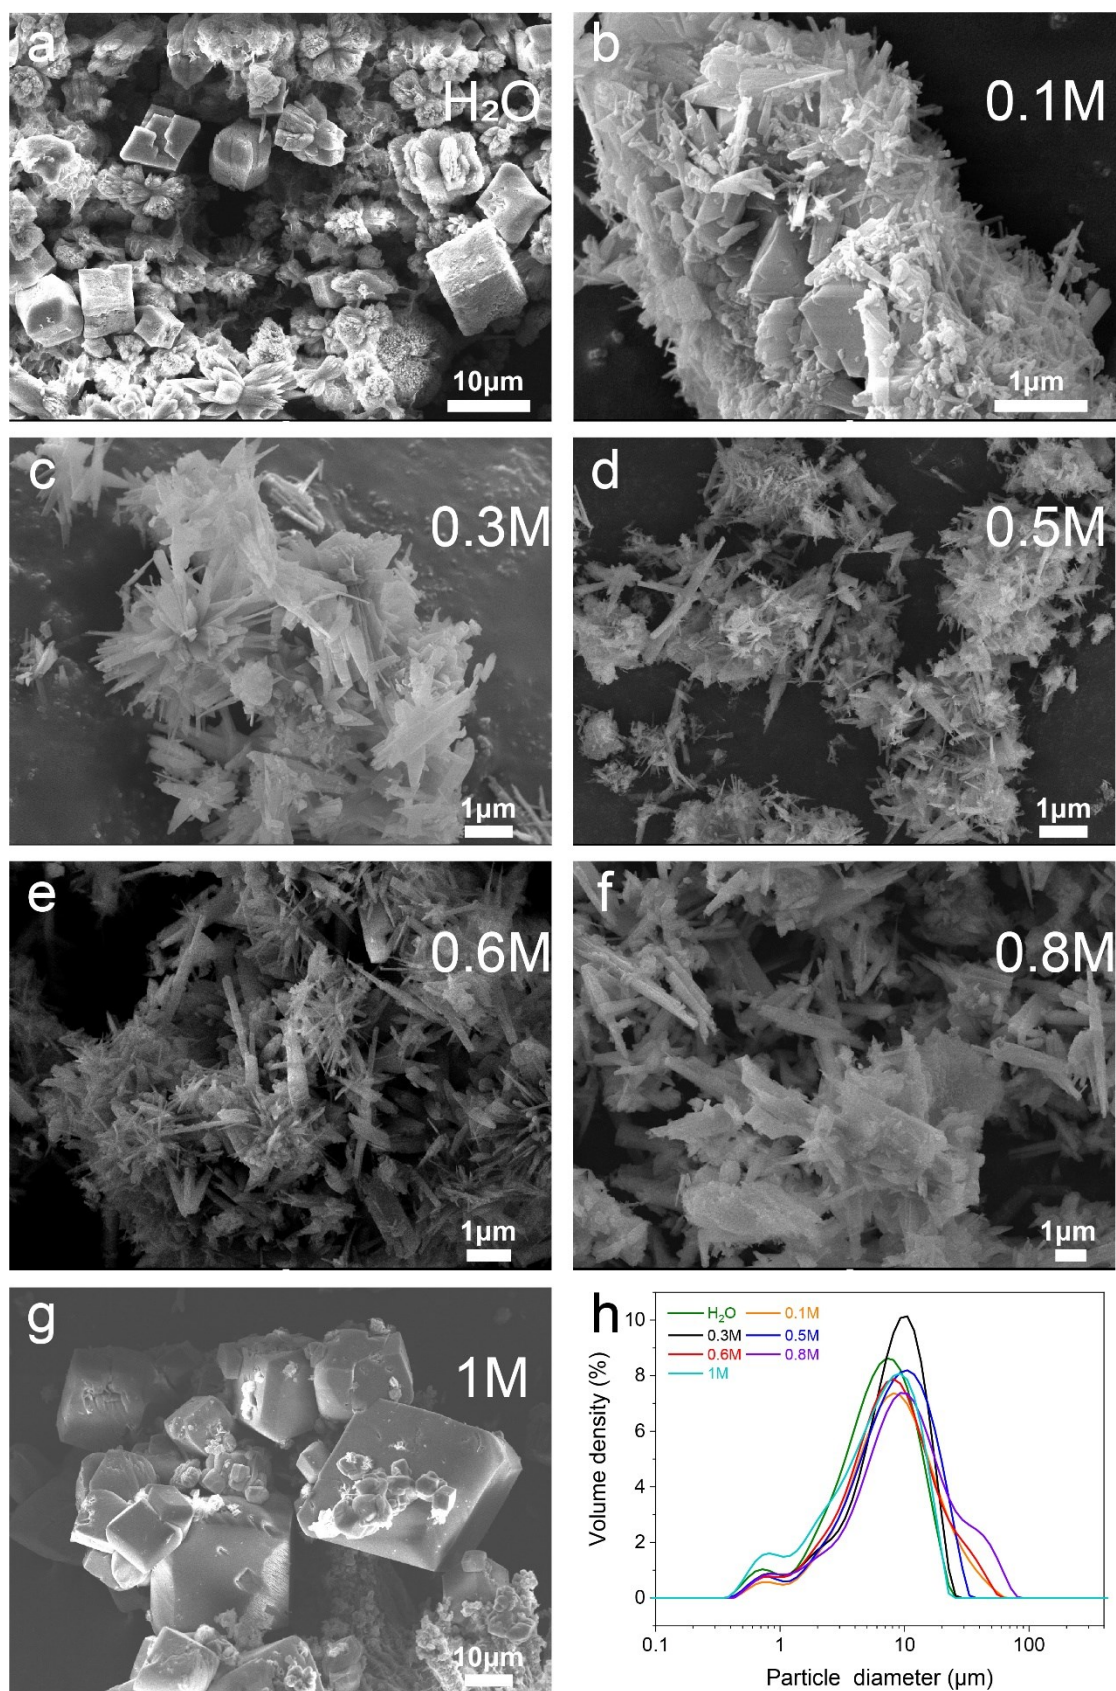

**Fig. S9.** SEM images and the particle size distribution of the precipitates collected after 24-hour CO<sub>2</sub> absorption in Ca(OH)<sub>2</sub> slurries of different NaOH concentrations.

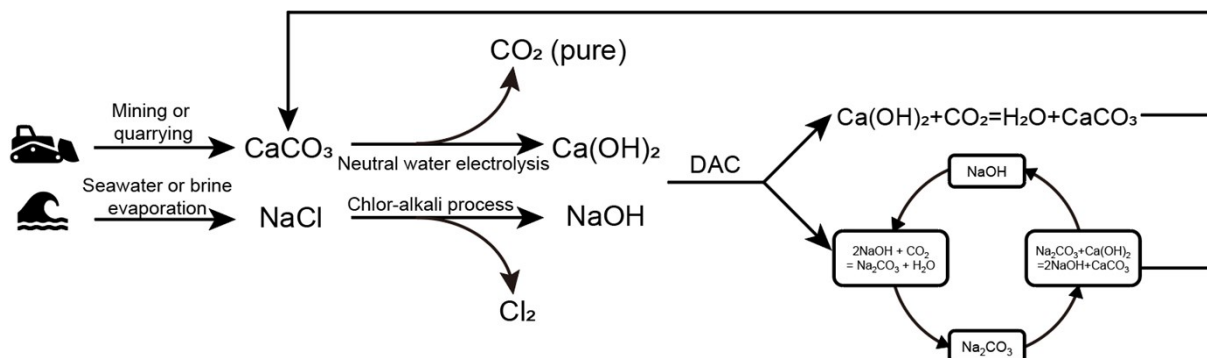

**Fig. S10.** Schematic representation of two-step direct air capture (DAC) process that takes account of the sources of  $\text{CaCO}_3$  and  $\text{NaOH}$ . Dilute  $\text{CO}_2$  is captured by  $\text{Ca(OH)}_2$  slurry added with  $\text{NaOH}$  catalyst.

**Note S3. Thermodynamic analysis for the necessity of pH gradient:**

In aqueous solution, dissolved CO<sub>2</sub> (aq) can be converted to CO<sub>3</sub><sup>2-</sup> through the following two reactions:

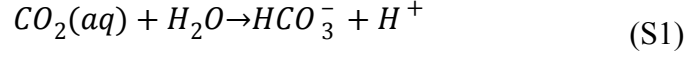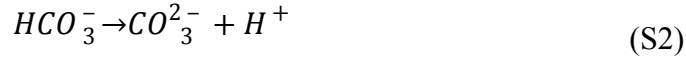

The equilibrium constants for reaction (S1) and (S2) are:<sup>1</sup>

$$K_{S1} = \frac{[H^+][HCO_3^-]}{[CO_2(aq)]} = 4.435 \times 10^{-7} \quad (S3)$$

$$K_{S2} = \frac{[CO_3^{2-}][H^+]}{[HCO_3^-]} = 4.676 \times 10^{-11} \quad (S4)$$

These equations can be solved and the relations between molar fractions ( $\alpha$ ) of different carbonic species and the  $[H^+]$  are given as follows:

$$\alpha_{CO_2(aq)} = \frac{[H^+]^2}{[H^+]^2 + [H^+]K_{S1} + K_{S1}K_{S2}} \quad (S5)$$

$$\alpha_{HCO_3^-} = \frac{[H^+]K_{S1}}{[H^+]^2 + [H^+]K_{S1} + K_{S1}K_{S2}} \quad (S6)$$

$$\alpha_{CO_3^{2-}} = \frac{K_{S1}K_{S2}}{[H^+]^2 + [H^+]K_{S1} + K_{S1}K_{S2}} \quad (S7)$$

The CO<sub>2</sub> equilibrium diagram is plotted according to Eqs. S5-7, as shown in Fig. S11. The dominant dissolved carbonic species alters by changing the pH. CO<sub>2</sub> (aq) dominates at a pH below 4 while CO<sub>3</sub><sup>2-</sup> is the predominant specie in the solution of which pH is above 12. Therefore, to realize a simultaneous CO<sub>2</sub> fixation in the absorption chamber and a CO<sub>2</sub> release in the anode chamber, a large pH gradient is necessary.

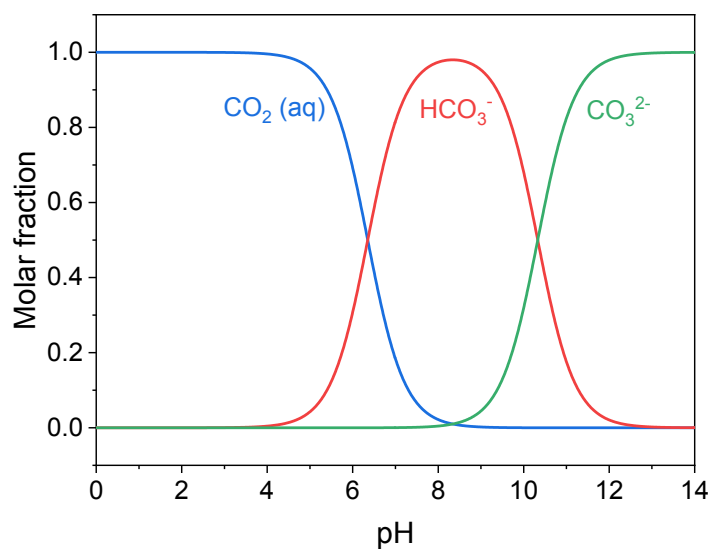

**Fig. S11.** Effect of pH on the  $\text{CO}_2$  equilibrium in aqueous solution at 25 °C.

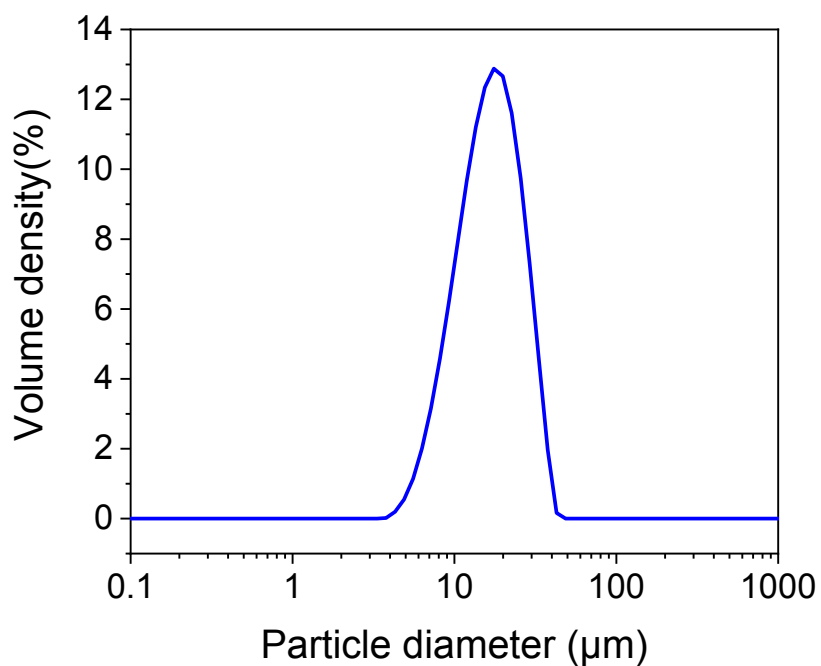

**Fig. S12.** The particle size distribution of the precipitates collected in the DAC chamber after 50-hour simultaneous direct air capture and carbonate regeneration.



**Note S4. Nernst potential for water electrolysis:**

As shown in the Pourbaix diagram for water (Fig. S13), the Nernst potential for water electrolysis is 1.205 V when the neutral electrolysis starts with an electrolyte of pH=6.57 at 55 °C. With the progress of the electrolysis, the pH gradient between catholyte and anolyte contributes to an increase in the voltage for water splitting by  $65.1 \times \Delta\text{pH}$  (in mV). Therefore, when using a large pH gradient, the Nernst potential for water electrolysis increases (e.g. 1.72 V for pH=4 at anode and pH=12 at cathode).

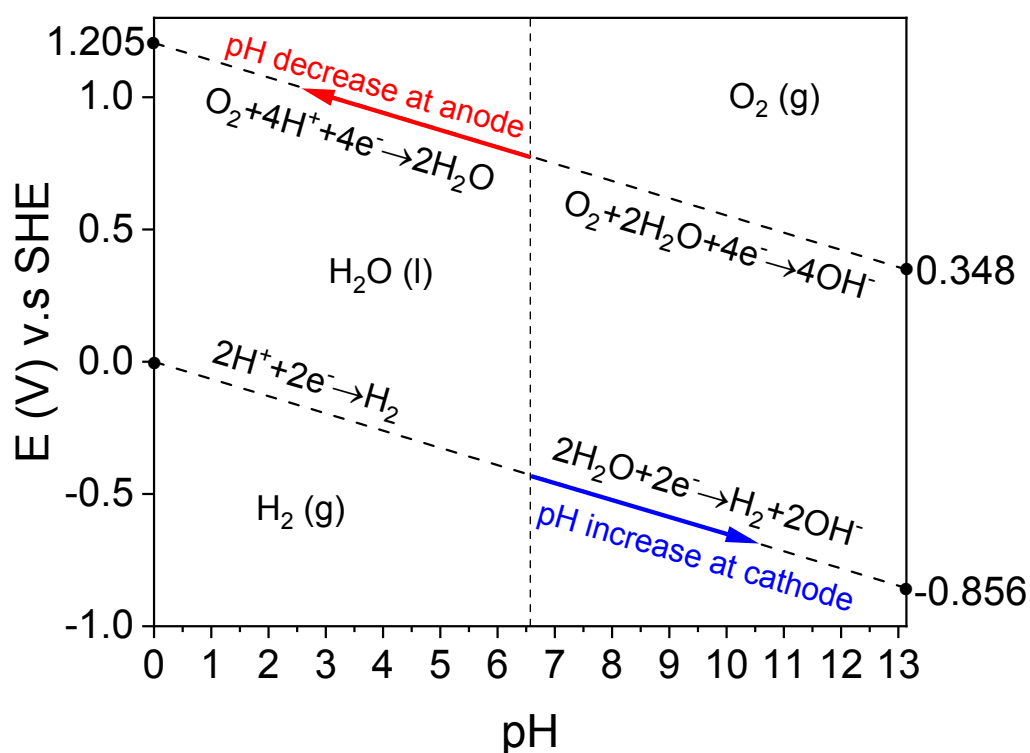

**Fig. S13.** Pourbaix diagram for water at 55 °C.

**Table S1.** Material balance for the capture and release of 1 mol/s of CO<sub>2</sub> via the simultaneous DAC and sorbent regeneration process.

| No. | Chambers                      |                               | T (°C) | Mass flow rate (kg/h) | Reaction enthalpy change (kJ/mol CO <sub>2</sub> ) |
|-----|-------------------------------|-------------------------------|--------|-----------------------|----------------------------------------------------|
| 1   | Carbonate dissolution chamber | CaCO <sub>3</sub> (s) in      | 55     | 360                   |                                                    |
|     |                               | CO <sub>2</sub> (g) out       |        | 158.4                 |                                                    |
|     |                               | Reaction (5)                  |        |                       | -15.875                                            |
| 2   | Anode chamber                 | H <sub>2</sub> O(l) in        | 55     | 64.8                  |                                                    |
|     |                               | O <sub>2</sub> (g) out        |        | 57.6                  |                                                    |
|     |                               | Reaction (1)                  |        |                       | 284.880                                            |
| 3   | Cathode chamber               | H <sub>2</sub> O(l) in        | 55     | 129.6                 |                                                    |
|     |                               | H <sub>2</sub> (g) out        |        | 7.2                   |                                                    |
|     |                               | Reaction (2)                  |        |                       | 100.117                                            |
| 4   | DAC chamber                   | air in                        | 40     | 248571.4              |                                                    |
|     |                               | CO <sub>2</sub> -lean air out |        | 248413.0              |                                                    |
|     |                               | CaCO <sub>3</sub> (s) out     |        | 360                   |                                                    |
|     |                               | Reaction (6)                  |        |                       | -107.276                                           |
|     |                               | Reaction (13)                 |        |                       | 17.449                                             |



**Note S5. Material balance and energy efficiency:**

The material balance for a scaled-up simultaneous CO<sub>2</sub> capture and sorbent regeneration is presented in Table S1, assuming a simultaneous capture of 1 mol/s of CO<sub>2</sub> and a regeneration of 1 mol/s CaCO<sub>3</sub>. The operation temperatures of the chambers were identical to those described in the section on “demonstration of simultaneous direct air capture and carbonate regeneration”. Further assumptions include: all the chambers operate isothermally; the evaporative loss of water during the operation is omitted; all the substances are pure; all the reactions achieve chemical equilibrium.

Solid CaCO<sub>3</sub> is added into the carbonate dissolution chamber at a rate of 360 kg/h, while 15.875 kJ/mol CO<sub>2</sub> of heat is released through the carbonate dissolution reaction (reaction 5). The unit kJ/mol CO<sub>2</sub> is equivalent to kW for a CO<sub>2</sub> capture rate of 1 mol/s. For water electrolysis in the anode and cathode chambers, splitting water at a rate of 194.4 kg/h requires 384.997 kW in total. In the DAC chamber, the capture of CO<sub>2</sub> by OH<sup>-</sup> (reaction 6) rejects 107.276 kW as heat to the surrounding environment, part of which was offset by the endothermic association between Ca<sup>2+</sup> and CO<sub>3</sub><sup>2-</sup> (reaction 10) at 40 °C.

It can be seen that the net reaction for the whole system capturing 1 mol CO<sub>2</sub> and regenerating 1 mol CaCO<sub>3</sub> simultaneously is written as follows with  $\Delta G_{S8}^{55^{\circ}\text{C}} = 397.412 \text{ kJ/mol}$ .

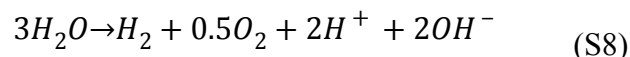

By combining with the actual energy expenditure observed in the section on “demonstration of simultaneous direct air capture and carbonate regeneration”, the energy efficiency for a large-scale operation can be estimated. For an applied current of 40 mA, the mean voltage was 4.31 V during the operation. The CO<sub>2</sub> capture time is 48 hours and the fraction of CO<sub>2</sub> captured is set to be 0.9 to simplify the calculation. It is assumed that the temperatures of the reactors can be maintained by using the wasted heat from electricity generation supported by the promising development of heat-power cogeneration. Therefore, based on a lab-scale unoptimized system, the energy efficiency, defined as the ratio of the Gibbs free energy change of the net reaction to the actual energy expenditure per mole CO<sub>2</sub> captured,<sup>2</sup> for large-scale simultaneous CO<sub>2</sub> capture and CaCO<sub>3</sub> regeneration process is roughly estimated:

$$\text{Energy efficiency} = \frac{\Delta G_{S8}^{55^{\circ}\text{C}}}{\frac{UIt}{n_{\text{CO}_2 \text{ captured}}}} = 15.1\%$$

### **References for ESI:**

1. Roine, A. *HSC Chemistry Database 5.11*, HSC Chemistry Database 5.11, Outokumpu Research: Helsinki, Finland, 2002.
2. Rau, G. H.; Carroll, S. A.; Bourcier, W. L.; Singleton, M. J.; Smith, M. M.; Aines, R. D., Direct electrolytic dissolution of silicate minerals for air CO<sub>2</sub> mitigation and carbon-negative H<sub>2</sub> production. *Proc Natl Acad Sci USA* **2013**, *110* (25), 10095-100.
